# Supplementary material for: Cobalt nanoparticles encapsulated in nitrogen-doped carbon as a bifunctional catalyst for water electrolysis
Source: Royal Society of Chemistry journal article supplement (doi:10.1039/c4ta04337e), 2014-10-16
Supplement: c4ta04337e1.pdf [file c4ta04337e1.pdf]

Supporting information

**Cobalt nanoparticles encapsulated in nitrogen-doped carbon as a  
bifunctional catalyst for water electrolysis**

Jing Wang,<sup>[a, b]</sup> Dunfeng Gao,<sup>[a, b]</sup> Guoxiong Wang,<sup>\*[a]</sup> Shu Miao,<sup>[c]</sup> Haihua Wu,<sup>[a, b]</sup>

Jiayuan Li,<sup>[a, b]</sup> and Xinhe Bao<sup>\*[a, c]</sup>

*<sup>a</sup>State Key Laboratory of Catalysis, Dalian Institute of Chemical Physics, Chinese Academy of Sciences, 457 Zhongshan Road, Dalian, 116023, China.*

*<sup>b</sup>University of Chinese Academy of Sciences, Beijing, 100039, China.*

*<sup>c</sup>Dalian National Laboratory for Clean Energy, Dalian Institute of Chemical Physics, Chinese Academy of Sciences, Dalian, 116023, China*

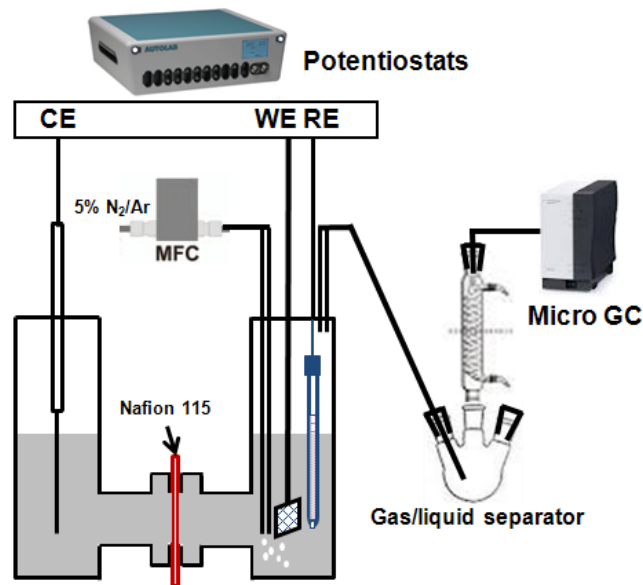

Scheme S1 Schematic diagram for detecting the hydrogen and oxygen evolution on the Co@N-C electrode in an H shape cell.

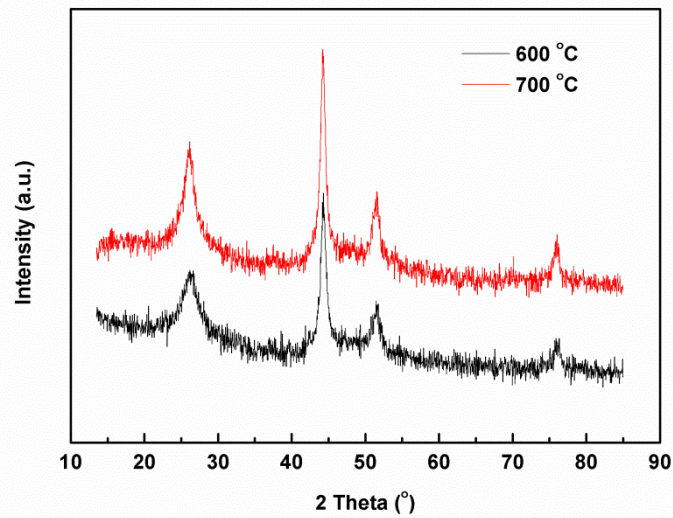

Fig. S1 XRD patterns of Co@N-C pyrolyzed at 600 °C and 700 °C, followed with acid-leaching.

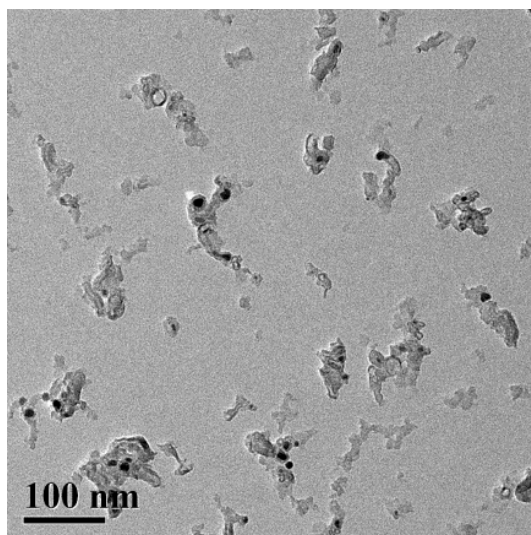

(a)

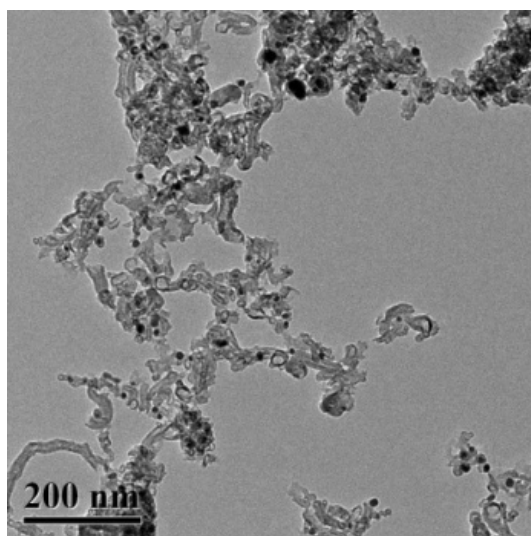

(b)

Fig. S2 TEM images of Co@N-C pyrolyzed at 600 °C (a) and 700 °C (b) followed with acid-leaching.

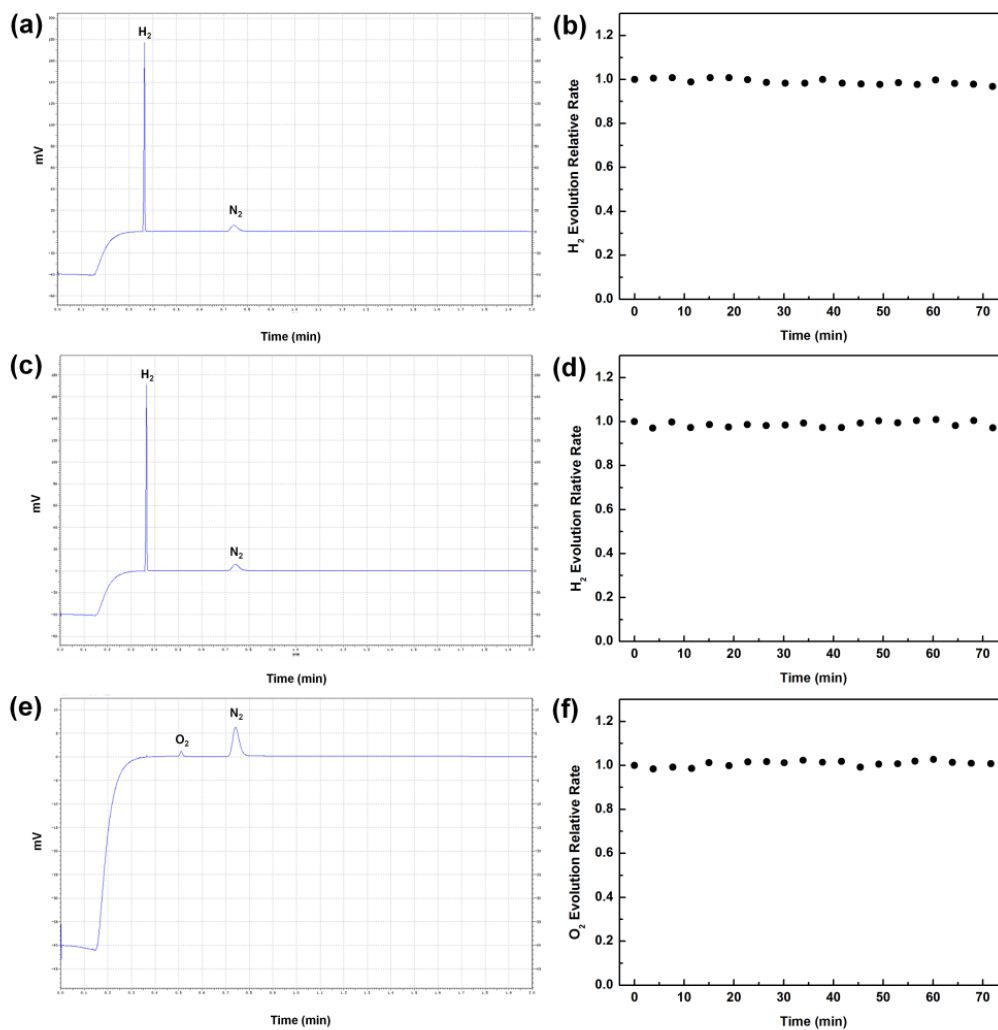

Fig. S3 The GC spectra and H<sub>2</sub> evolution relative rate on the Co@N-C electrode with the electrolysis time in 1 M HClO<sub>4</sub> (a), (b) and 1 M KOH solution (c), (d). The GC spectra and O<sub>2</sub> evolution relative rate on the Co@N-C electrode with the electrolysis time in 1 M KOH solution (e), (f).

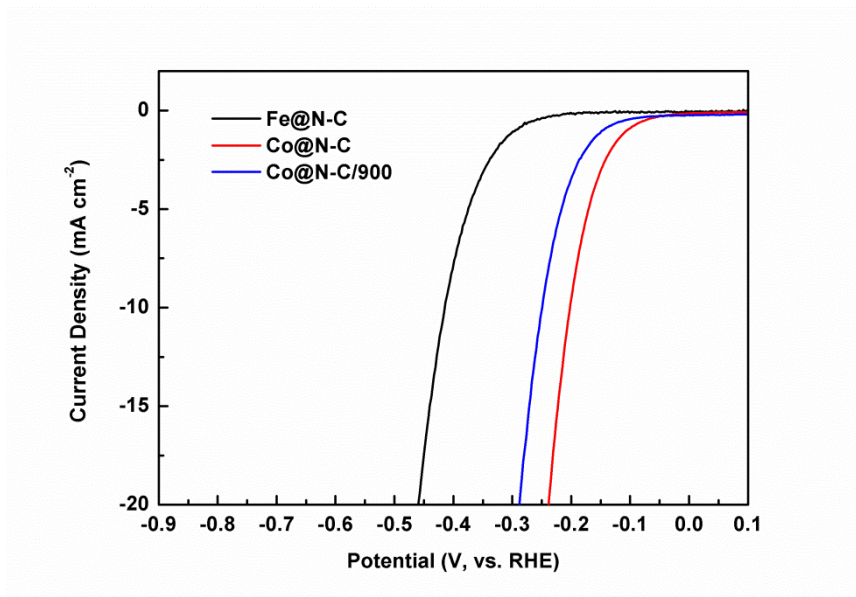

(a)

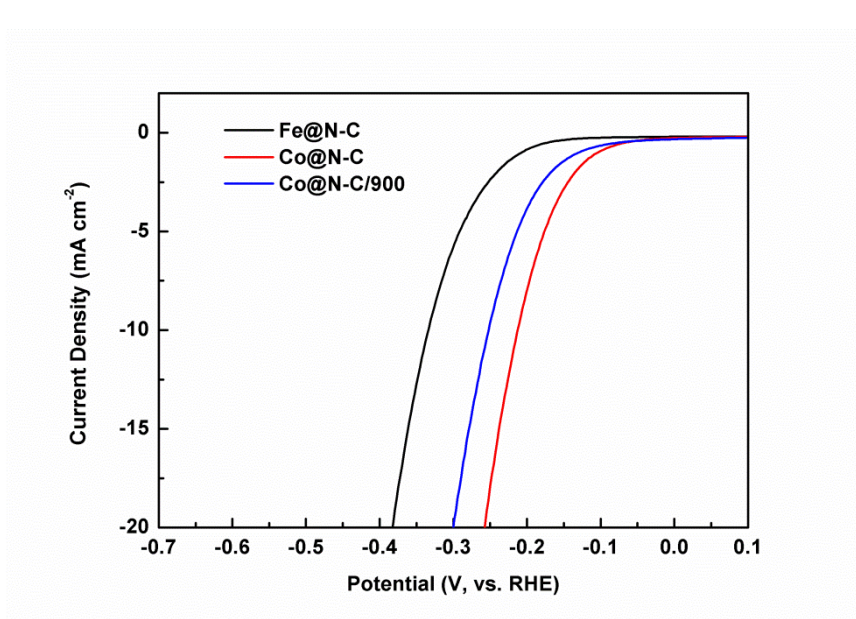

(b)

Fig. S4 HER activities of Fe@N-C, Co@N-C and Co@N-C/900 in 1 M HClO<sub>4</sub> (a) and 1 M KOH (b) solutions.

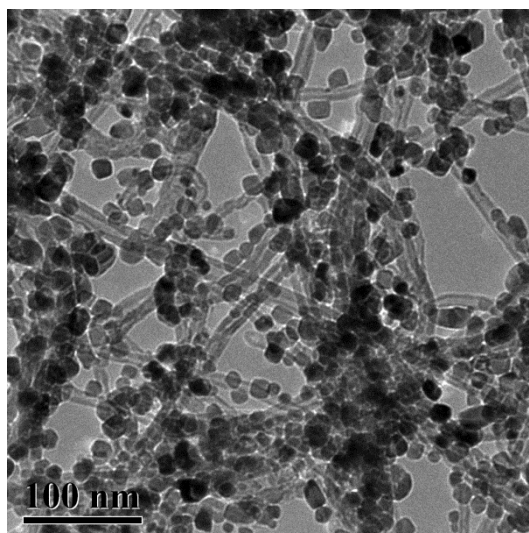

Fig. S5 TEM image of CoO<sub>x</sub>/MWCNT.

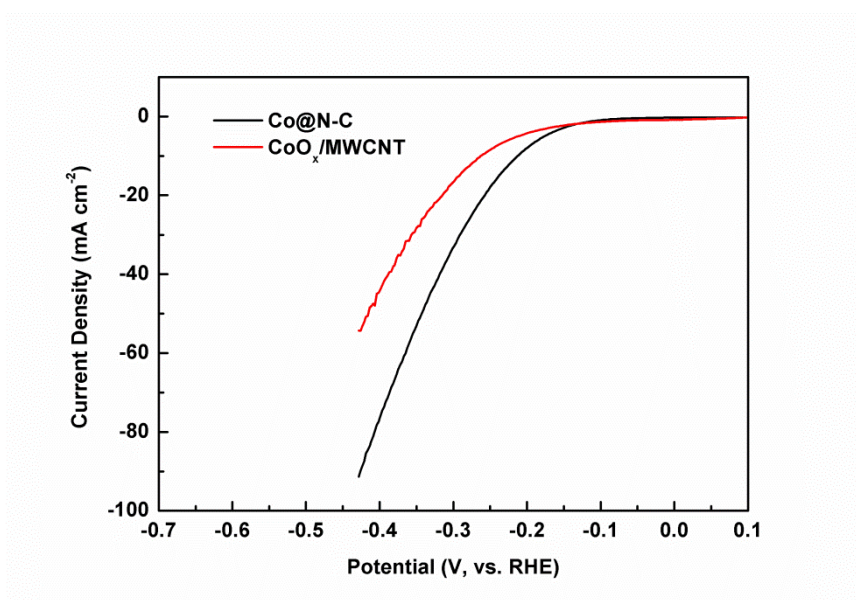

Fig. S6 HER activities of Co@N-C and CoO<sub>x</sub>/MWCNT in 1M KOH solution.

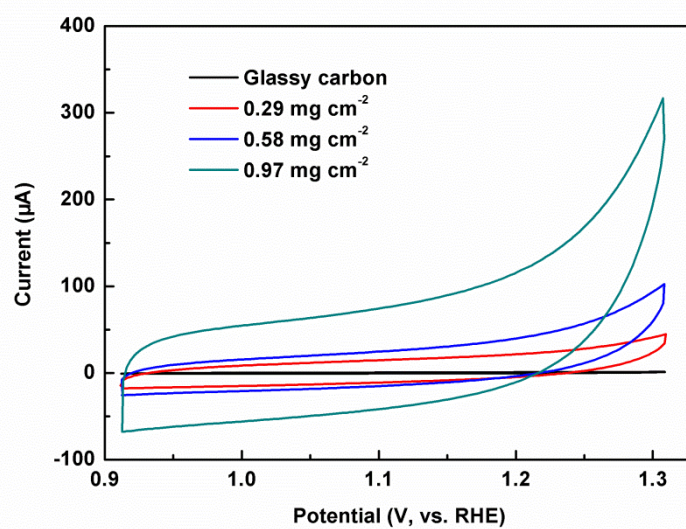

(a)

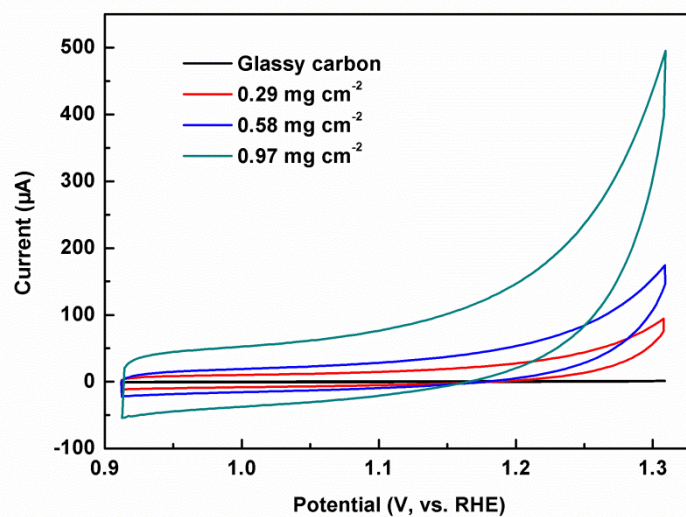

(b)

Fig. S7 Cyclic voltammeteries of Fe@N-C (a) and Co@N-C (b) with different loadings on the glassy carbon electrode. (scan rate: 10  $\text{mV s}^{-1}$ , electrolyte solution: 1 M KOH solution, 25  $^{\circ}\text{C}$ )

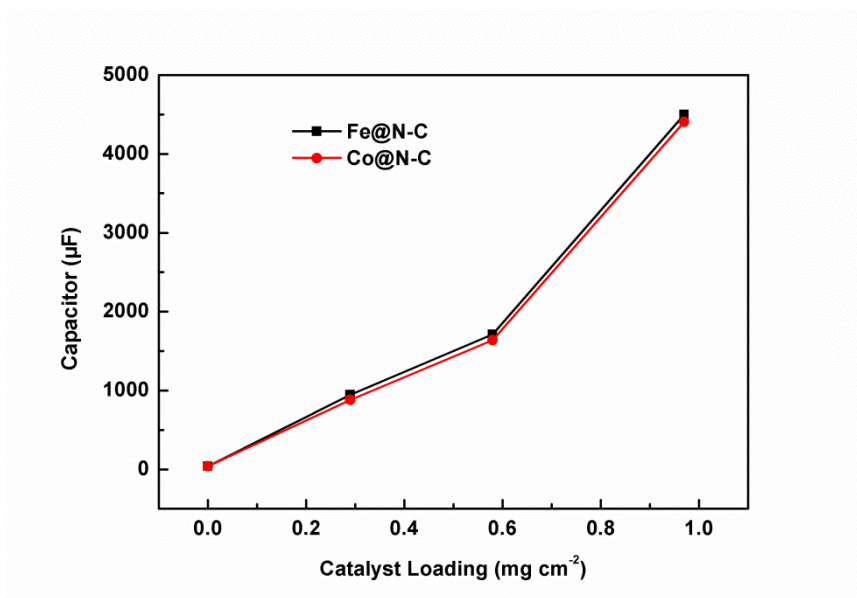

Fig. S8 The relationship between the capacitor and catalyst loading of Fe@N-C and Co@N-C.



Table S1. Summary of representative non-precious-metal HER catalysts in acidic medium

| Catalyst                         | [H <sup>+</sup> ] concentration (mol L <sup>-1</sup> ) | Overpotential (V, at 10 mA cm <sup>-2</sup> ) | Reference |
|----------------------------------|--------------------------------------------------------|-----------------------------------------------|-----------|
| Co@N-C                           | 1                                                      | 0.20                                          | This work |
| MoS <sub>2</sub> /Au             | 1                                                      | 0.22                                          | [36]      |
| MoS <sub>2</sub> /Graphene       | 1                                                      | 0.16                                          | [37]      |
| O-doped MoS <sub>2</sub>         | 1                                                      | 0.19                                          | [38]      |
| Defect-rich MoS <sub>2</sub>     | 1                                                      | 0.19                                          | [39]      |
| Ni <sub>2</sub> P                | 1                                                      | 0.14                                          | [40]      |
| Cu <sub>2</sub> MoS <sub>4</sub> | 1                                                      | 0.30                                          | [41]      |
| CoP <sub>2</sub> /CNTs           | 1                                                      | 0.13                                          | [42]      |
| Co/N-doped CNTs                  | 1                                                      | 0.26                                          | [22]      |

Table S2. Summary of representative non-precious-metal HER catalysts in alkaline medium

| Catalyst                               | [OH <sup>-</sup> ] concentration (mol L <sup>-1</sup> ) | Overpotential (V, at 10 mA cm <sup>-2</sup> ) | Reference |
|----------------------------------------|---------------------------------------------------------|-----------------------------------------------|-----------|
| Co@N-C                                 | 1                                                       | 0.21                                          | This work |
| Ni <sub>3</sub> S <sub>2</sub> /MWCNTs | 1                                                       | 0.48                                          | [44]      |
| Ni <sub>2</sub> P                      | 1                                                       | 0.23                                          | [45]      |
| MoB                                    | 1                                                       | 0.22                                          | [46]      |
| Mo <sub>2</sub> C                      | 1                                                       | 0.19                                          | [46]      |
| Cu/Ni                                  | 1                                                       | 0.26                                          | [47]      |
| Co/N-doped CNTs                        | 1                                                       | 0.37                                          | [22]      |

Table S3. Summary of representative non-precious-metal OER catalysts in alkaline medium

| Catalyst                                                      | [OH <sup>-</sup> ] concentration (mol L <sup>-1</sup> ) | Overpotential (V, at 10 mV cm <sup>-2</sup> ) | Reference |
|---------------------------------------------------------------|---------------------------------------------------------|-----------------------------------------------|-----------|
| Co@N-C                                                        | 1                                                       | 0.40                                          | This work |
| Mn <sub>2</sub> O <sub>3</sub>                                | 1                                                       | 0.45                                          | [48]      |
| Zn <sub>x</sub> Co <sub>3-x</sub> O <sub>4</sub>              | 1                                                       | 0.35                                          | [49]      |
| La <sub>0.8</sub> Sr <sub>0.2</sub> CoO <sub>3</sub>          | 1                                                       | 0.46                                          | [50]      |
| Co(CO <sub>3</sub> ) <sub>0.5</sub> (OH)·0.11H <sub>2</sub> O | 1                                                       | 0.47                                          | [51]      |
| Nitrogen-doped carbon                                         | 0.1                                                     | 0.38                                          | [8]       |
